# Supplementary material
Source: PubMed Central journal article supplement (PMC4825636)
Supplement: kccy-14-18-1069928-s001.pdf [file kccy-14-18-1069928-s001.pdf]

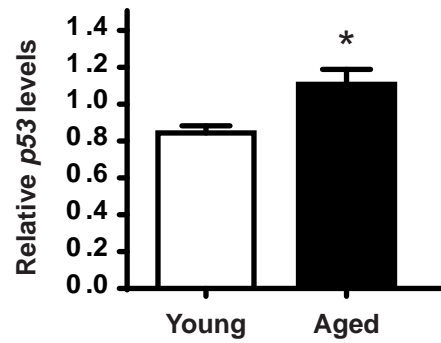

**Figure S1.** *p53* expression is elevated in aged mouse testes. qPCR analysis of *p53* in young and aged testes normalized to  $\beta$ -*actin*. Graphs represent mean value  $\pm$  s.e.m. n = 6 mice per group

**Figure S1**
